# Supplementary material for: The impact of alcohol consumption and physical activity on breast cancer: The role of breast cancer risk
Source: PubMed Central journal article supplement — Int J Cancer. 2020 Jan 13;147(4):931–9. doi: 10.1002/ijc.32846 (PMC7383781; doi:10.1002/ijc.32846), 2020-01-13
Supplement: IJC-147-931-s001.pdf [file IJC-147-931-s001.pdf]

## **The impact of alcohol consumption and physical activity on breast cancer: the role of breast cancer risk**

Linda Rainey, Mikael Eriksson, Thang Trinh, Kamila Czene, Mireille J.M. Broeders, Daniëlle van der Waal, Per Hall

## Table of contents

|                                                                        |          |
|------------------------------------------------------------------------|----------|
| <b>Supplement 1. Results of the complete-case analysis .....</b>       | <b>3</b> |
| Table 1 .....                                                          | 3        |
| Table 2 .....                                                          | 4        |
| Table 3 .....                                                          | 5        |
| Table 4 .....                                                          | 7        |
| <b>Supplement 2. Supplementary analysis with imputed dataset .....</b> | <b>9</b> |

**Supplement 1. Results of the complete-case analysis**
**Table 1.** Characteristics of the total study population and by Tyrer-Cuzick 10-year breast cancer risk

| Characteristic                             | All women  | TC 10-year breast cancer risk |             |            |
|--------------------------------------------|------------|-------------------------------|-------------|------------|
|                                            |            | <3.0%                         | 3.0 to 4.9% | ≥5.0%      |
| Participants (n)                           | 47,527     | 24,632                        | 16,240      | 6,655      |
| Breast cancer cases (n)                    | 809        | 314                           | 288         | 207        |
| Age (years), mean (SD)                     | 54.0 (9.6) | 51.1 (9.7)                    | 56.9 (8.6)  | 58.1 (7.8) |
| BMI, mean (SD)                             | 25.2 (4.2) | 24.9 (4.2)                    | 25.5 (4.1)  | 25.7 (4.2) |
| Age at menarche (years), mean (SD)         | 13.1 (1.5) | 13.2 (1.5)                    | 13.0 (1.4)  | 12.9 (1.4) |
| Nulliparous (%)                            | 12.4       | 9.4                           | 15.3        | 16.3       |
| Parous women only                          |            |                               |             |            |
| Age at first birth (years), mean (SD)      | 27.3 (5.2) | 26.4 (5.1)                    | 28.2 (5.1)  | 28.6 (5.3) |
| Number of childbirths, mean (SD)           | 2.2 (0.8)  | 2.3 (0.8)                     | 2.1 (0.8)   | 2.1 (0.8)  |
| Family history of breast cancer (%)        | 12.8       | 0.6                           | 10.1        | 64.6       |
| Education level (%)                        |            |                               |             |            |
| Secondary school                           | 11.9       | 11.6                          | 12.3        | 11.8       |
| Gymnasium                                  | 30.7       | 34.0                          | 27.7        | 25.7       |
| University or higher                       | 54.2       | 51.4                          | 56.4        | 58.8       |
| Other                                      | 3.3        | 3.0                           | 3.6         | 3.6        |
| Oral contraceptive use, ever (%)           | 85.7       | 87.0                          | 84.3        | 83.8       |
| Premenopausal (%)                          | 44.3       | 58.9                          | 29.9        | 25.1       |
| Postmenopausal women only                  |            |                               |             |            |
| Age at menopause (years), mean (SD)        | 50.0 (5.1) | 47.7 (5.7)                    | 51.1 (4.3)  | 51.7 (4.3) |
| HRT use (%)                                |            |                               |             |            |
| Never                                      | 69.0       | 65.1                          | 61.6        | 62.3       |
| Past                                       | 24.8       | 21.4                          | 23.4        | 23.7       |
| Current                                    | 6.1        | 4.5                           | 6.4         | 6.1        |
| Smoking status (%)                         |            |                               |             |            |
| Never                                      | 48.8       | 50.9                          | 47.0        | 45.4       |
| Past                                       | 39.9       | 37.0                          | 42.7        | 43.8       |
| Current                                    | 11.3       | 12.1                          | 10.3        | 10.9       |
| Alcohol consumption (g/day, %)             |            |                               |             |            |
| None                                       | 18.4       | 19.9                          | 16.6        | 17.1       |
| 0.1 to 9.9                                 | 62.4       | 62.8                          | 62.2        | 61.2       |
| ≥10.0                                      | 19.2       | 17.3                          | 21.1        | 21.7       |
| Total physical activity (MET-hours/day, %) |            |                               |             |            |
| <40.0                                      | 35.9       | 34.3                          | 37.5        | 38.1       |
| 40.0 to 44.9                               | 35.7       | 34.6                          | 37.1        | 37.0       |
| ≥ 45.0                                     | 28.3       | 31.2                          | 25.4        | 24.9       |

**Table 2.** Effect of alcohol consumption and physical activity on breast cancer for all women

| Lifestyle factor                         |         |      |                          | Breast cancer    |                  | Breast cancer    |            |
|------------------------------------------|---------|------|--------------------------|------------------|------------------|------------------|------------|
|                                          | N total | %    | N all cases              | Crude OR [95%CI] | Adj.* OR [95%CI] |                  |            |
| <b>Alcohol (g/day)</b>                   |         |      |                          |                  |                  |                  |            |
| 0                                        | 8,751   | 18.4 | 130                      | Reference        |                  | Reference        |            |
| 0.1-9.9                                  | 29,647  | 62.4 | 498                      | 1.1              | [0.9, 1.4]       | 1.2              | [1.0, 1.4] |
| 10.0-40.0                                | 9,137   | 19.2 | 181                      | 1.3              | [1.1, 1.7]       | 1.3              | [1.0, 1.6] |
| Per 10 g/day                             | 47,535  | 100  | 809                      | 1.1              | [1.0, 1.2]       | 1.1              | [1.0, 1.2] |
| <b>Alcohol (g/day)</b>                   |         |      |                          |                  |                  |                  |            |
|                                          | N total | %    | N ER+ cases <sup>a</sup> | Crude OR [95%CI] |                  | Adj.* OR [95%CI] |            |
| 0                                        | 8,730   | 18.4 | 92                       | Reference        |                  | Reference        |            |
| 0.1-9.9                                  | 29,578  | 62.4 | 380                      | 1.2              | [1.0, 1.5]       | 1.3              | [1.0, 1.6] |
| 10.0-40.0                                | 9,106   | 19.2 | 135                      | 1.4              | [1.1, 1.8]       | 1.4              | [1.1, 1.8] |
| Per 10 g/day                             | 47,414  | 100  | 607                      | 1.2              | [1.1, 1.3]       | 1.1              | [1.0, 1.2] |
| <b>Alcohol (g/day)</b>                   |         |      |                          |                  |                  |                  |            |
|                                          | N total | %    | N ER- cases <sup>a</sup> | Crude OR [95%CI] |                  | Adj.* OR [95%CI] |            |
| 0                                        | 8,730   | 18.4 | 17                       | Reference        |                  | Reference        |            |
| 0.1-9.9                                  | 29,578  | 62.4 | 49                       | 0.9              | [0.5, 1.5]       | 0.8              | [0.4, 1.3] |
| 10.0-40.0                                | 9,106   | 19.2 | 15                       | 0.8              | [0.4, 1.7]       | 0.7              | [0.4, 1.5] |
| Per 10 g/day                             | 47,414  | 100  | 81                       | 0.9              | [0.7, 1.2]       | 0.9              | [0.6, 1.2] |
| <b>Physical activity</b>                 |         |      |                          |                  |                  |                  |            |
|                                          | N total | %    | N all cases              | Crude OR [95%CI] |                  | Adj.* OR [95%CI] |            |
| <b>Total activity (MET-hours/day)</b>    |         |      |                          |                  |                  |                  |            |
| <40.0                                    | 17,075  | 35.9 | 276                      | Reference        |                  | Reference        |            |
| 40.0 to 44.9                             | 13,462  | 28.3 | 227                      | 1.1              | [0.9, 1.3]       | 1.2              | [1.0, 1.4] |
| ≥45.0                                    | 16,990  | 35.7 | 306                      | 1.0              | [0.9, 1.2]       | 1.3              | [1.0, 1.5] |
| Per 5 MET-hours/day increase             | 47,527  | 100  | 809                      | 1.0              | [0.9, 1.0]       | 1.0              | [1.0, 1.1] |
| <b>Moderate activity (hours/day)</b>     |         |      |                          |                  |                  |                  |            |
| < 2.0                                    | 14,118  | 29.7 | 222                      | Reference        |                  | Reference        |            |
| 2.0 to 4.9                               | 18,445  | 36.7 | 305                      | 1.1              | [1.0, 1.3]       | 1.1              | [0.9, 1.3] |
| ≥ 5.0                                    | 14,963  | 31.5 | 282                      | 1.0              | [0.8, 1.1]       | 1.1              | [0.9, 1.3] |
| Per 1 hour/day increase                  | 47,527  | 100  | 809                      | 1.0              | [1.0, 1.0]       | 1.0              | [1.0, 1.0] |
| <b>Vigorous activity (hours/day)</b>     |         |      |                          |                  |                  |                  |            |
| < 0.2                                    | 31,810  | 66.9 | 532                      | Reference        |                  | Reference        |            |
| ≥ 0.2                                    | 15,716  | 33.1 | 277                      | 1.1              | [0.9, 1.2]       | 1.1              | [1.0, 1.3] |
| Per 1 hour/day increase                  | 47,527  | 100  | 809                      | 1.1              | [0.9, 1.3]       | 1.1              | [0.9, 1.4] |
| <b>Recreational activity (hours/day)</b> |         |      |                          |                  |                  |                  |            |
| < 1.5                                    | 17,551  | 36.9 | 282                      | Reference        |                  | Reference        |            |
| 1.5 to 2.5                               | 13,872  | 29.2 | 236                      | 1.1              | [0.9, 1.3]       | 1.1              | [0.9, 1.3] |
| ≥ 2.5                                    | 16,103  | 33.9 | 291                      | 1.1              | [1.0, 1.3]       | 1.1              | [0.9, 1.3] |
| Per 1 hour/day increase                  | 47,527  | 100  | 809                      | 1.0              | [1.0, 1.0]       | 1.0              | [1.0, 1.1] |

\*Adjusted for age, BMI (<25.0, 25.0 to 29.9, ≥30.0 kg/m<sup>2</sup>), ethnicity (European ancestry yes/no), oral contraceptive use (ever, never), use of hormone replacement therapy (never, ever), family history of breast cancer in mother or sister(s) (yes, no), age at menarche (<13, 13, 14, ≥15 years), parity and age at first birth (nulliparous; one or two births, age at first birth <26 years; one or two births, age at first birth ≥26 years; ≥3 births, age at first birth <26 years; ≥3 births, age at first birth ≥26 years), education level (secondary school, high school, university or higher, other), and menopausal status (post or premenopausal); <sup>a</sup> Breast cancer patients with missing data on ER status were excluded from the analysis (n=121)

**Table 3.** Effect of alcohol consumption and physical activity on breast cancer for women at varying levels of risk based on 10-year Tyrer-Cuzick predictions

| Lifestyle factor                  | 10y TC risk <3.0% |      |                               |                      |            | 10y TC risk 3.0-4.9% |      |                               |                      |            | 10y TC risk >5.0% |      |                               |                      |            |
|-----------------------------------|-------------------|------|-------------------------------|----------------------|------------|----------------------|------|-------------------------------|----------------------|------------|-------------------|------|-------------------------------|----------------------|------------|
|                                   | Breast cancer     |      | Breast cancer                 |                      |            | Breast cancer        |      | Breast cancer                 |                      |            | Breast cancer     |      | Breast cancer                 |                      |            |
| Alcohol (g/day)                   | N total           | %    | N all cases                   | Adj. <sup>a</sup> OR | [95%CI]    | N total              | %    | N all cases                   | Adj. <sup>a</sup> OR | [95%CI]    | N total           | %    | N all cases                   | Adj. <sup>a</sup> OR | [95%CI]    |
| 0                                 | 4,913             | 19.9 | 57                            |                      | Reference  | 2,700                | 16.6 | 37                            |                      | Reference  | 1,138             | 17.1 | 36                            |                      | Reference  |
| 0.1-9.9                           | 15,468            | 62.8 | 196                           | 1.1                  | [0.8, 1.4] | 10,106               | 62.2 | 179                           | 1.4                  | [1.0, 2.0] | 4,073             | 61.2 | 123                           | 1.0                  | [0.7, 1.5] |
| 10.0-40.0                         | 4,256             | 17.3 | 61                            | 1.1                  | [0.8, 1.6] | 3,435                | 21.2 | 72                            | 1.6                  | [1.0, 2.3] | 1,446             | 21.7 | 48                            | 1.2                  | [0.7, 1.8] |
| 10 g/day                          | 24,637            | 100  | 314                           | 1.1                  | [1.0, 1.3] | 16,241               | 100  | 288                           | 1.1                  | [1.0, 1.2] | 6,657             | 100  | 207                           | 1.1                  | [0.9, 1.3] |
| Alcohol (g/day)                   | N total           | %    | ER+ cases <sup>b</sup><br>(N) | Adj. <sup>a</sup> OR | [95%CI]    | N total              | %    | ER+ cases <sup>b</sup><br>(N) | Adj. <sup>a</sup> OR | [95%CI]    | N total           | %    | ER+ cases <sup>b</sup><br>(N) | Adj. <sup>a</sup> OR | [95%CI]    |
| 0                                 | 4,903             | 19.9 | 39                            |                      | Reference  | 2,693                | 16.6 | 26                            |                      | Reference  | 1,134             | 17.1 | 27                            |                      | Reference  |
| 0.1-9.9                           | 15,439            | 62.8 | 148                           | 1.2                  | [0.8, 1.7] | 10,078               | 62.2 | 137                           | 1.5                  | [1.0, 2.3] | 4,061             | 61.3 | 95                            | 1.1                  | [0.7, 1.7] |
| 10.0-40.0                         | 4,249             | 17.3 | 45                            | 1.3                  | [0.8, 2.0] | 3,423                | 21.1 | 56                            | 1.7                  | [1.1, 2.8] | 1,434             | 21.6 | 34                            | 1.1                  | [0.7, 1.9] |
| 10 g/day                          | 24,591            | 100  | 232                           | 1.2                  | [1.0, 1.4] | 16,194               | 100  | 219                           | 1.1                  | [1.0, 1.3] | 6,629             | 100  | 156                           | 1.1                  | [0.9, 1.3] |
| Physical activity                 | N total           | %    | N all cases                   | Adj. <sup>a</sup> OR | [95%CI]    | N total              | %    | N all cases                   | Adj. <sup>a</sup> OR | [95%CI]    | N total           | %    | N all cases                   | Adj. <sup>a</sup> OR | [95%CI]    |
| Total activity (MET-hours/day)    |                   |      |                               |                      |            |                      |      |                               |                      |            |                   |      |                               |                      |            |
| <40.0                             | 8,443             | 34.3 | 92                            |                      | Reference  | 6,095                | 37.5 | 109                           |                      | Reference  | 2,537             | 38.1 | 75                            |                      | Reference  |
| 40.0 to 44.9                      | 8,511             | 34.6 | 125                           | 1.4                  | [1.0, 1.8] | 6,018                | 37.1 | 103                           | 1.0                  | [0.8, 1.3] | 2,461             | 37.0 | 78                            | 1.1                  | [0.8, 1.5] |
| ≥45.0                             | 7,678             | 31.2 | 97                            | 1.3                  | [1.0, 1.8] | 4,127                | 25.4 | 76                            | 1.2                  | [0.9, 1.6] | 1,657             | 24.9 | 54                            | 1.2                  | [0.8, 1.8] |
| 5 MET-hours/day increase          | 24,632            | 100  | 314                           | 1.0                  | [0.9, 1.1] | 16,240               | 100  | 288                           | 1.1                  | [1.0, 1.2] | 6,655             | 100  | 207                           | 1.1                  | [1.0, 1.2] |
| Moderate activity (hours/day)     |                   |      |                               |                      |            |                      |      |                               |                      |            |                   |      |                               |                      |            |
| < 2.0                             | 6,058             | 24.6 | 82                            |                      | Reference  | 4,625                | 28.5 | 77                            |                      | Reference  | 1,908             | 28.7 | 54                            |                      | Reference  |
| 2.0 to 4.9                        | 5,251             | 21.3 | 70                            | 1.1                  | [0.8, 1.4] | 3,776                | 23.3 | 67                            | 1.1                  | [0.9, 1.5] | 1,566             | 23.5 | 41                            | 1.1                  | [0.8, 1.5] |
| ≥ 5.0                             | 13,322            | 54.1 | 162                           | 1.1                  | [0.9, 1.5] | 7,839                | 48.3 | 144                           | 1.1                  | [0.8, 1.5] | 3,181             | 47.8 | 112                           | 1.2                  | [0.8, 1.7] |
| 1 hour/day increase               | 24,632            | 100  | 314                           | 1.0                  | [1.0,1.0]  | 16,240               | 100  | 288                           | 1.0                  | [1.0,1.1]  | 6,655             | 100  | 207                           | 1.0                  | [1.0,1.1]  |
| Vigorous activity (hours/day)     |                   |      |                               |                      |            |                      |      |                               |                      |            |                   |      |                               |                      |            |
| < 0.2                             | 16,227            | 65.9 | 195                           |                      | Reference  | 10,992               | 67.7 | 193                           |                      | Reference  | 4,591             | 69.0 | 144                           |                      | Reference  |
| ≥ 0.2                             | 8,404             | 34.1 | 119                           | 1.2                  | [0.9, 1.5] | 5,248                | 32.3 | 95                            | 1.1                  | [0.9, 1.4] | 2,064             | 31.0 | 63                            | 1.0                  | [0.7, 1.4] |
| 1 hour/day increase               | 24,632            | 100  | 314                           | 1.1                  | [0.8, 1.5] | 16,240               | 100  | 288                           | 1.3                  | [1.0, 1.8] | 6,655             | 100  | 207                           | 0.9                  | [0.5, 1.4] |
| Recreational activity (hours/day) |                   |      |                               |                      |            |                      |      |                               |                      |            |                   |      |                               |                      |            |
| < 1.5                             | 8,666             | 35.2 | 105                           |                      | Reference  | 6,297                | 38.8 | 98                            |                      | Reference  | 2,588             | 38.9 | 79                            |                      | Reference  |
| 1.5 to 2.5                        | 7,122             | 28.9 | 83                            | 0.9                  | [0.7, 1.2] | 4,753                | 29.2 | 85                            | 1.2                  | [0.9, 1.6] | 1,997             | 30.0 | 68                            | 1.1                  | [0.8, 1.6] |
| ≥ 2.5                             | 8,843             | 35.9 | 126                           | 1.1                  | [0.8, 1.4] | 5,190                | 32.0 | 105                           | 1.3                  | [1.0, 1.8] | 2,070             | 31.1 | 60                            | 0.9                  | [0.7, 1.3] |
| 1 hour/day increase               | 24,632            | 100  | 314                           | 1.0                  | [1.0, 1.1] | 16,240               | 100  | 288                           | 1.0                  | [1.0, 1.1] | 6,655             | 100  | 207                           | 0.9                  | [0.9, 1.0] |

Table 3. Continued

| Lifestyle factor                  | 10y TC risk <3.0% |      |               |                      |            | 10y TC risk 3.0-4.9% |      |               |                      |            | 10y TC risk >5.0% |      |               |                      |            |
|-----------------------------------|-------------------|------|---------------|----------------------|------------|----------------------|------|---------------|----------------------|------------|-------------------|------|---------------|----------------------|------------|
|                                   | Breast cancer     |      | Breast cancer |                      |            | Breast cancer        |      | Breast cancer |                      |            | Breast cancer     |      | Breast cancer |                      |            |
| Physical activity                 | N total           | %    | N all cases   | Adj. <sup>a</sup> OR | [95%CI]    | N total              | %    | N all cases   | Adj. <sup>a</sup> OR | [95%CI]    | N total           | %    | N all cases   | Adj. <sup>a</sup> OR | [95%CI]    |
| Total activity (MET-hours/day)    |                   |      |               |                      |            |                      |      |               |                      |            |                   |      |               |                      |            |
| <40.0                             | 8,443             | 34.3 | 92            |                      | Reference  | 6,095                | 37.5 | 109           |                      | Reference  | 2,537             | 38.1 | 75            |                      | Reference  |
| 40.0 to 44.9                      | 8,511             | 34.6 | 125           | 1.4                  | [1.0, 1.8] | 6,018                | 37.1 | 103           | 1.0                  | [0.8, 1.3] | 2,461             | 37.0 | 78            | 1.1                  | [0.8, 1.5] |
| ≥45.0                             | 7,678             | 31.2 | 97            | 1.3                  | [1.0, 1.8] | 4,127                | 25.4 | 76            | 1.2                  | [0.9, 1.6] | 1,657             | 24.9 | 54            | 1.2                  | [0.8, 1.8] |
| 5 MET-hours/day increase          | 24,632            | 100  | 314           | 1.0                  | [0.9, 1.1] | 16,240               | 100  | 288           | 1.1                  | [1.0, 1.2] | 6,655             | 100  | 207           | 1.1                  | [1.0, 1.2] |
| Moderate activity (hours/day)     |                   |      |               |                      |            |                      |      |               |                      |            |                   |      |               |                      |            |
| < 2.0                             | 6,058             | 24.6 | 82            |                      | Reference  | 4,625                | 28.5 | 77            |                      | Reference  | 1,908             | 28.7 | 54            |                      | Reference  |
| 2.0 to 4.9                        | 5,251             | 21.3 | 70            | 1.1                  | [0.8, 1.4] | 3,776                | 23.3 | 67            | 1.1                  | [0.9, 1.5] | 1,566             | 23.5 | 41            | 1.1                  | [0.8, 1.5] |
| ≥ 5.0                             | 13,322            | 54.1 | 162           | 1.1                  | [0.9, 1.5] | 7,839                | 48.3 | 144           | 1.1                  | [0.8, 1.5] | 3,181             | 47.8 | 112           | 1.2                  | [0.8, 1.7] |
| 1 hour/day increase               | 24,632            | 100  | 314           | 1.0                  | [1.0,1.0]  | 16,240               | 100  | 288           | 1.0                  | [1.0,1.1]  | 6,655             | 100  | 207           | 1.0                  | [1.0,1.1]  |
| Vigorous activity (hours/day)     |                   |      |               |                      |            |                      |      |               |                      |            |                   |      |               |                      |            |
| < 0.2                             | 16,227            | 65.9 | 195           |                      | Reference  | 10,992               | 67.7 | 193           |                      | Reference  | 4,591             | 69.0 | 144           |                      | Reference  |
| ≥ 0.2                             | 8,404             | 34.1 | 119           | 1.2                  | [0.9, 1.5] | 5,248                | 32.3 | 95            | 1.1                  | [0.9, 1.4] | 2,064             | 31.0 | 63            | 1.0                  | [0.7, 1.4] |
| 1 hour/day increase               | 24,632            | 100  | 314           | 1.1                  | [0.8, 1.5] | 16,240               | 100  | 288           | 1.3                  | [1.0, 1.8] | 6,655             | 100  | 207           | 0.9                  | [0.5, 1.4] |
| Recreational activity (hours/day) |                   |      |               |                      |            |                      |      |               |                      |            |                   |      |               |                      |            |
| < 1.5                             | 8,666             | 35.2 | 105           |                      | Reference  | 6,297                | 38.8 | 98            |                      | Reference  | 2,588             | 38.9 | 79            |                      | Reference  |
| 1.5 to 2.5                        | 7,122             | 28.9 | 83            | 0.9                  | [0.7, 1.2] | 4,753                | 29.2 | 85            | 1.2                  | [0.9, 1.6] | 1,997             | 30.0 | 68            | 1.1                  | [0.8, 1.6] |
| ≥ 2.5                             | 8,843             | 35.9 | 126           | 1.1                  | [0.8, 1.4] | 5,190                | 32.0 | 105           | 1.3                  | [1.0, 1.8] | 2,070             | 31.1 | 60            | 0.9                  | [0.7, 1.3] |
| 1 hour/day increase               | 24,632            | 100  | 314           | 1.0                  | [1.0, 1.1] | 16,240               | 100  | 288           | 1.0                  | [1.0, 1.1] | 6,655             | 100  | 207           | 0.9                  | [0.9, 1.0] |

<sup>a</sup>Adjusted for age, BMI (<25.0, 25.0 to 29.9, ≥30.0 kg/m<sup>2</sup>), ethnicity (European ancestry yes/no), oral contraceptive use (ever, never), use of hormone replacement therapy (never, ever), family history of breast cancer in mother or sister(s) (yes, no), age at menarche (<13, 13, 14, ≥15 years), parity and age at first birth (nulliparous; one or two births, age at first birth <26 years; one or two births, age at first birth ≥26 years; ≥3 births, age at first birth <26 years; ≥3 births, age at first birth ≥26 years), education level (secondary school, high school, university or higher, other), and menopausal status (post or premenopausal). <sup>b</sup> Breast cancer patients with missing data on ER status were excluded from the analysis (n=121)

**Table 4.** Effect of alcohol consumption and physical activity on breast cancer for pre- and postmenopausal women

| Lifestyle factor | Premenopausal |      |                            |                      |            | Postmenopausal |      |                            |                      |            |
|------------------|---------------|------|----------------------------|----------------------|------------|----------------|------|----------------------------|----------------------|------------|
|                  | N total       |      | Breast cancer              |                      |            | N total        |      | Breast cancer              |                      |            |
| Alcohol (g/day)  | N total       | %    | N all cases                | Adj. <sup>a</sup> OR | [95%CI]    | N total        | %    | N all cases                | Adj. <sup>a</sup> OR | [95%CI]    |
| 0                | 3,925         | 18.7 | 38                         |                      | Reference  | 4,826          | 18.2 | 92                         |                      | Reference  |
| 0.1-9.9          | 13,719        | 65.2 | 182                        | 1.3                  | [0.9, 1.9] | 15,928         | 60.1 | 316                        | 1.1                  | [0.9, 1.4] |
| 10.0-40.0        | 3,401         | 16.2 | 38                         | 1.0                  | [0.7, 1.7] | 5,728          | 21.6 | 143                        | 1.4                  | [1.0, 1.8] |
| 10 g/day         | 21,045        | 100  | 258                        | 1.0                  | [0.9, 1.2] | 26,482         | 100  | 551                        | 1.1                  | [1.0, 1.2] |
| Alcohol (g/day)  | N total       | %    | N ER+ cases <sup>b,c</sup> | Adj. <sup>a</sup> OR | [95%CI]    | N total        | %    | N ER+ cases <sup>b,c</sup> | Adj. <sup>a</sup> OR | [95%CI]    |
| 0                | 3,925         | 18.7 | 25                         |                      | Reference  | 4,826          | 18.2 | 67                         |                      | Reference  |
| 0.1-9.9          | 13,719        | 65.2 | 141                        | 1.6                  | [1.0, 2.4] | 15,928         | 60.1 | 239                        | 1.2                  | [0.9, 1.5] |
| 10.0-40.0        | 3,401         | 16.2 | 29                         | 1.2                  | [0.7, 2.1] | 5,728          | 21.6 | 106                        | 1.4                  | [1.0, 2.0] |
| 10 g/day         | 21,045        | 100  | 258                        | 1.1                  | [0.9, 1.3] | 26,482         | 100  | 551                        | 1.2                  | [1.0, 1.3] |

Table 4. Continued

| Lifestyle factor                  | Premenopausal |      |               |                      |            | Postmenopausal |      |               |                      |            |
|-----------------------------------|---------------|------|---------------|----------------------|------------|----------------|------|---------------|----------------------|------------|
|                                   | N total       | %    | Breast cancer |                      |            | N total        | %    | Breast cancer |                      |            |
| Physical activity                 |               |      | N all cases   | Adj. <sup>a</sup> OR | [95%CI]    |                |      | N all cases   | Adj. <sup>a</sup> OR | [95%CI]    |
| Total activity (MET-hours/day)    |               |      |               |                      |            |                |      |               |                      |            |
| <40.0                             | 6,870         | 32.6 | 74            |                      | Reference  | 10,205         | 38.5 | 202           |                      | Reference  |
| 40.0 to 44.9                      | 7,197         | 34.2 | 92            | 1.2                  | [0.9, 1.6] | 9,793          | 37.0 | 214           | 1.2                  | [1.0, 1.4] |
| ≥45.0                             | 6,978         | 33.2 | 92            | 1.3                  | [0.9, 1.7] | 6,484          | 24.5 | 135           | 1.3                  | [1.0, 1.6] |
| 5 MET-hours/day increase          | 21,045        | 100  | 258           | 1.0                  | [1.0, 1.1] | 26,482         | 100  | 551           | 1.0                  | [1.0, 1.1] |
| Moderate activity (hours/day)     |               |      |               |                      |            |                |      |               |                      |            |
| < 2.0                             | 5,049         | 24.0 | 58            |                      | Reference  | 7,542          | 28.5 | 155           |                      | Reference  |
| 2.0 to 4.9                        | 4,512         | 21.4 | 61            | 1.3                  | [1.0, 1.8] | 6,081          | 23.0 | 117           | 1.0                  | [0.8, 1.3] |
| ≥ 5.0                             | 11,484        | 54.6 | 139           | 1.2                  | [0.9, 1.6] | 12,858         | 48.6 | 279           | 1.1                  | [0.9, 1.4] |
| 1 hour/day increase               | 21,045        | 100  | 258           | 1.0                  | [1.0, 1.1] | 26,482         | 100  | 551           | 1.0                  | [1.0, 1.1] |
| Vigorous activity (hours/day)     |               |      |               |                      |            |                |      |               |                      |            |
| < 0.2                             | 13,504        | 64.2 | 151           |                      | Reference  | 18,306         | 69.1 | 381           |                      | Reference  |
| ≥ 0.2                             | 7,541         | 35.8 | 107           | 1.2                  | [0.9, 1.6] | 8,175          | 30.9 | 170           | 1.0                  | [0.9, 1.3] |
| 1 hour/day increase               | 21,045        | 100  | 258           | 1.3                  | [1.0, 1.7] | 26,482         | 100  | 551           | 1.0                  | [0.8, 1.3] |
| Recreational activity (hours/day) |               |      |               |                      |            |                |      |               |                      |            |
| < 1.5                             | 7,307         | 34.7 | 78            |                      | Reference  | 10,244         | 38.7 | 204           |                      | Reference  |
| 1.5 to 2.5                        | 6,238         | 29.6 | 77            | 1.2                  | [0.9, 1.6] | 7,634          | 28.8 | 159           | 1.0                  | [0.8, 1.3] |
| ≥ 2.5                             | 7,500         | 35.6 | 103           | 1.4                  | [1.1, 1.9] | 8,603          | 32.5 | 188           | 1.0                  | [0.8, 1.2] |
| 1 hour/day increase               | 21,045        | 100  | 258           | 1.1                  | [1.0, 1.1] | 26,482         | 100  | 551           | 1.0                  | [0.9, 1.0] |

<sup>a</sup>Adjusted for age, BMI (<25.0, 25.0 to 29.9, ≥30.0 kg/m<sup>2</sup>), ethnicity (European ancestry yes/no), oral contraceptive use (ever, never), use of hormone replacement therapy (never, ever), family history of breast cancer in mother or sister(s) (yes, no), age at menarche (<13, 13, 14, ≥15 years), parity and age at first birth (nulliparous; one or two births, age at first birth <26 years; one or two births, age at first birth ≥26 years; ≥3 births, age at first birth <26 years; ≥3 births, age at first birth ≥26 years), and education level (secondary school, high school, university or higher, other); <sup>b</sup>Breast cancer patients with missing data on ER status were excluded from the analysis (n=121); <sup>c</sup>We were unable to perform the stratified analysis for ER- breast cancers due to a relatively small sample size (n=81)



**Supplement 2.** Effect of alcohol consumption and physical activity on breast cancer for pre- and postmenopausal women (results from imputed dataset as described in main article)

| Lifestyle factor | Premenopausal |      |                            |                      |              | Postmenopausal |      |                            |                      |              |
|------------------|---------------|------|----------------------------|----------------------|--------------|----------------|------|----------------------------|----------------------|--------------|
|                  | Breast cancer |      | Breast cancer              |                      |              | Breast cancer  |      | Breast cancer              |                      |              |
| Alcohol (g/day)  | N total       | %    | N all cases                | Adj. <sup>a</sup> OR | [95%CI]      | N total        | %    | N all cases                | Adj. <sup>a</sup> OR | [95%CI]      |
| 0                | 5,007         | 19.7 | 44                         |                      | Reference    | 6,093          | 18.9 | 115                        |                      | Reference    |
| 0.1-9.9          | 16,018        | 63.0 | 205                        | 1.34                 | [0.94, 1.91] | 18,912         | 58.7 | 374                        | 1.08                 | [0.86, 1.35] |
| 10.0-40.0        | 4,391         | 17.3 | 49                         | 1.08                 | [0.69, 1.69] | 7,232          | 22.4 | 171                        | 1.30                 | [1.00, 1.70] |
| 10 g/day         | 25,417        | 100  | 298                        | 1.03                 | [0.87, 1.21] | 32,237         | 100  | 659                        | 1.11                 | [1.01, 1.22] |
| Alcohol (g/day)  | N total       | %    | N ER+ cases <sup>b,c</sup> | Adj. <sup>a</sup> OR | [95%CI]      | N total        | %    | N ER+ cases <sup>b,c</sup> | Adj. <sup>a</sup> OR | [95%CI]      |
| 0                | 5,001         | 19.7 | 31                         |                      | Reference    | 6,080          | 18.9 | 86                         |                      | Reference    |
| 0.1-9.9          | 16,000        | 63.0 | 160                        | 1.55                 | [1.01, 2.36] | 18,869         | 58.7 | 282                        | 1.12                 | [0.86, 1.46] |
| 10.0-40.0        | 4,387         | 17.3 | 39                         | 1.24                 | [0.73, 2.10] | 7,214          | 22.4 | 127                        | 1.35                 | [1.00, 1.84] |
| 10 g/day         | 25,388        | 100  | 229                        | 1.07                 | [0.89, 1.29] | 32,163         | 100  | 495                        | 1.14                 | [1.03, 1.27] |

## Supplement 2. Continued

| Lifestyle factor                  | Premenopausal |      |               |                      |              | Postmenopausal |      |               |                      |              |
|-----------------------------------|---------------|------|---------------|----------------------|--------------|----------------|------|---------------|----------------------|--------------|
|                                   |               |      | Breast cancer |                      |              |                |      | Breast cancer |                      |              |
| Physical activity                 | N total       | %    | N all cases   | Adj. <sup>a</sup> OR | [95%CI]      | N total        | %    | N all cases   | Adj. <sup>a</sup> OR | [95%CI]      |
| Total activity (MET-hours/day)    |               |      |               |                      |              |                |      |               |                      |              |
| <40.0                             | 8,308         | 32.7 | 89            |                      | Reference    | 12,454         | 38.6 | 240           |                      | Reference    |
| 40.0 to 44.9                      | 8,581         | 33.8 | 107           | 1.20                 | [0.89, 1.63] | 11,699         | 36.3 | 256           | 1.18                 | [0.97, 1.42] |
| ≥45.0                             | 8,528         | 33.5 | 101           | 1.22                 | [0.90, 1.65] | 8,084          | 25.1 | 163           | 1.24                 | [1.00, 1.55] |
| 5 MET-hours/day increase          | 25,417        | 100  | 298           | 1.04                 | [0.95, 1.13] | 32,237         | 100  | 659           | 1.03                 | [0.96, 1.10] |
| Moderate activity (hours/day)     |               |      |               |                      |              |                |      |               |                      |              |
| < 2.0                             | 8,984         | 35.3 | 101           |                      | Reference    | 12,865         | 39.9 | 255           |                      | Reference    |
| 2.0 to 4.9                        | 7,398         | 29.1 | 94            | 1.31                 | [0.96, 1.77] | 11,164         | 34.6 | 239           | 1.02                 | [0.84, 1.24] |
| ≥ 5.0                             | 9,036         | 35.6 | 102           | 1.19                 | [0.88, 1.60] | 8,208          | 25.5 | 165           | 1.14                 | [0.92, 1.42] |
| 1 hour/day increase               | 25,417        | 100  | 298           | 1.01                 | [0.97, 1.05] | 32,237         | 100  | 659           | 1.02                 | [0.99, 1.06] |
| Vigorous activity (hours/day)     |               |      |               |                      |              |                |      |               |                      |              |
| < 0.2                             | 16,154        | 63.6 | 178           |                      | Reference    | 21,936         | 68.0 | 450           |                      | Reference    |
| ≥ 0.2                             | 9,263         | 36.4 | 120           | 1.16                 | [0.91, 1.49] | 10,301         | 32.0 | 209           | 1.02                 | [0.85, 1.22] |
| 1 hour/day increase               | 25,417        | 100  | 298           | 1.29                 | [1.00, 1.68] | 32,237         | 100  | 659           | 0.93                 | [0.72, 1.22] |
| Recreational activity (hours/day) |               |      |               |                      |              |                |      |               |                      |              |
| < 1.5                             | 8,831         | 34.7 | 94            |                      | Reference    | 12,393         | 38.4 | 241           |                      | Reference    |
| 1.5 to 2.5                        | 7,285         | 28.7 | 86            | 1.19                 | [0.87, 1.63] | 9,051          | 28.1 | 187           | 1.03                 | [0.84, 1.27] |
| ≥ 2.5                             | 9,300         | 36.6 | 119           | 1.37                 | [1.02, 1.86] | 10,793         | 33.5 | 231           | 1.00                 | [0.82, 1.27] |
| 1 hour/day increase               | 25,417        | 100  | 298           | 1.07                 | [1.00, 1.13] | 32,237         | 100  | 659           | 0.98                 | [0.93, 1.03] |

<sup>a</sup>Adjusted for age, BMI (<25.0, 25.0 to 29.9, ≥30.0 kg/m<sup>2</sup>), ethnicity (European ancestry yes/no), oral contraceptive use (ever, never), use of menopausal hormone therapy (never, ever), family history of breast cancer in mother or sister(s) (yes, no), age at menarche (<13, 13, 14, ≥15 years), parity and age at first birth (nulliparous; one or two births, age at first birth <26 years; one or two births, age at first birth ≥26 years; ≥3 births, age at first birth <26 years; ≥3 births, age at first birth ≥26 years), and education level (secondary school, high school, university or higher, other); <sup>b</sup> Breast cancer patients with ER- status were excluded from the analysis (n=101); <sup>c</sup> We were unable to perform the stratified analysis for ER- breast cancers due to a relatively small sample size (n=29 for premenopausal women and n=74 for postmenopausal women)
